# Supplementary material for: Chemically modified graphitic carbon nitride nanosheets for the selective turn-off fluorescence detection of Al(iii) ions in crabs (Brachyura)
Source: Royal Society of Chemistry journal article supplement (doi:10.1039/d4ay00806e), 2024-01-01
Supplement: d4ay00806e1.pdf [file d4ay00806e1.pdf]

## Chemically modified graphitic carbon nitride nanosheets for selective turn-off fluorescent detection of Al(III) ions in crabs (*Brachyura*)

Y.G. Abou El-Reash<sup>1,2</sup>, Osama El-Awady<sup>2</sup>, Faisal K. Algethami<sup>1</sup>, Fathi S. Awad<sup>2,3\*</sup>

<sup>1</sup> Department of Chemistry, Faculty of Science, Imam Mohammad Ibn Saud Islamic University, P.O. Box, 90950, Riyadh 11623, Saudi Arabia.

<sup>2</sup> Chemistry Department, Faculty of Science, Mansoura University, 23768 Mansoura, Egypt.

<sup>3</sup> Chemistry Department, Faculty of Science, New Mansoura University, New Mansoura City, Egypt.

### Supporting Information

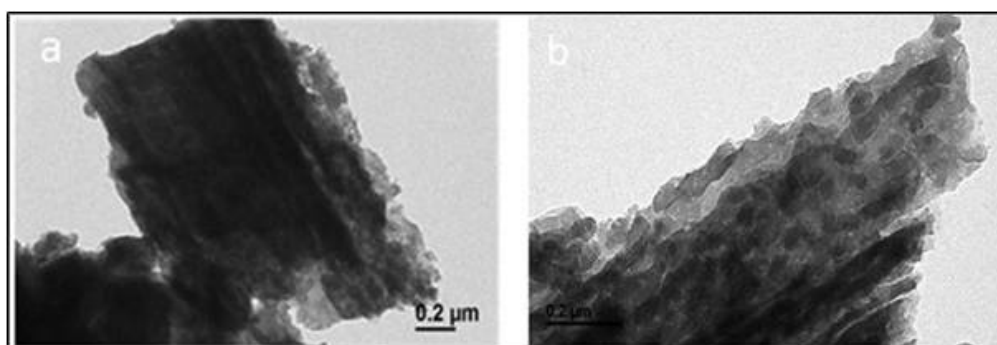

Figure S1: TEM of g-CN (a), and OH/g-CN (b).

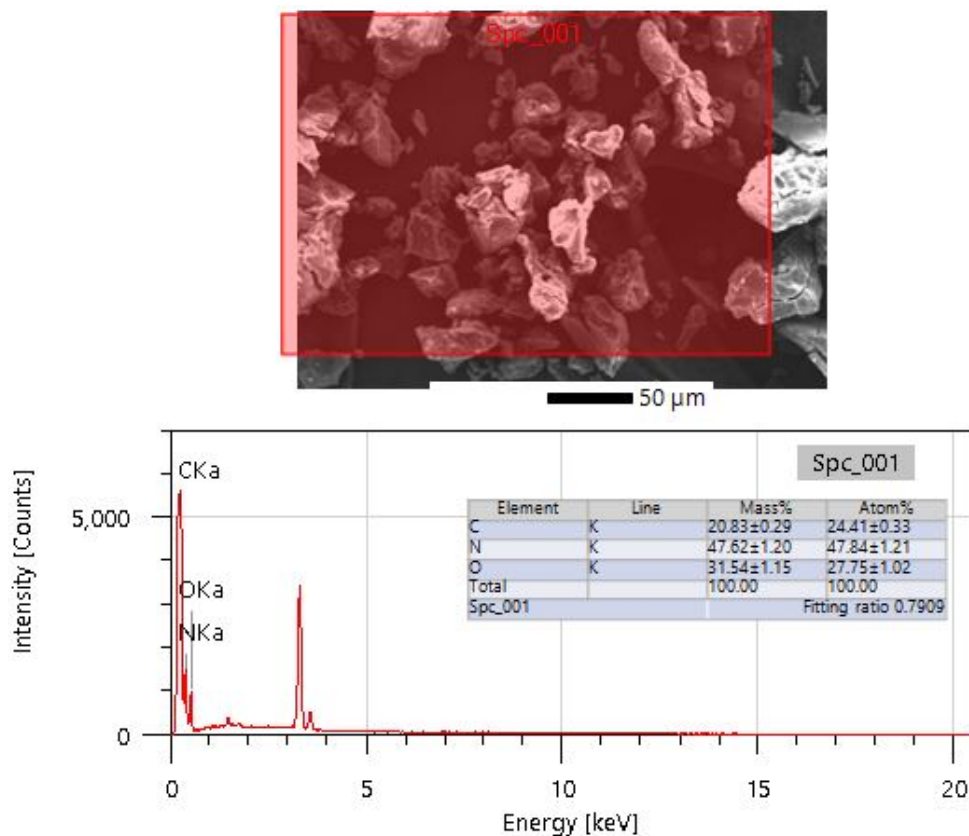

Figure S2. EDX analysis of OH/g-CN.

**Table S1.** The elemental composition of g-CN and HO/g-CN from XPS analysis.

| Sample  | C (%) | O (%) | N (%) |
|---------|-------|-------|-------|
| g-CN    | 45.98 | 2.62  | 51.4  |
| HO/g-CN | 38.23 | 18.55 | 43.22 |

**Table S2:** Different techniques for AL (III) detections

| Techniques                                                     | LOD                                 | Response time | Linear calibration graph                                           | RSD (%) | Applications                                                           | Ref. |
|----------------------------------------------------------------|-------------------------------------|---------------|--------------------------------------------------------------------|---------|------------------------------------------------------------------------|------|
| ICP-AES                                                        | $0.07 \times 10^{-3}$ $\mu\text{M}$ | –             | –                                                                  | 3.7     | Rice flour and Lake water                                              | 1    |
| ICP-AES                                                        | $2.22 \times 10^{-3}$ $\mu\text{M}$ | --            | –                                                                  | 1.6     | Biological and vegetable samples, human urine and spiked water samples | 2    |
| ICP-MS                                                         | $1.85 \times 10^{-3}$ $\mu\text{M}$ | –             | –                                                                  | 11      | Real water samples                                                     | 3    |
| GF-AAS                                                         | $2.2 \times 10^{-3}$ $\mu\text{M}$  | –             | $(1 \times 10^{-5}$ to $250 \times 10^{-5}) \times 10^{-5}$ (mg/L) | 3.1–5.2 | Biological and environmental                                           | 4    |
| FAAS                                                           | $6.6 \times 10^{-3}$ $\mu\text{M}$  | –             | (0.1 to 20.0) (mg/L)                                               | 2.4     | Real water samples                                                     | 5    |
| FAAS                                                           | $2.86 \times 10^{-4}$ $\mu\text{M}$ | –             | $(1 \times 10^{-3}$ to $20 \times 10^{-3})$ (mg/L)                 | 5       | Dam waters                                                             | 6    |
| Fluorescence spectrophotometer                                 | $4.7 \times 10^{-4}$ $\mu\text{M}$  | 3 min         | $(6.19 \times 10^{-7}$ to $6 \times 10^{-5})$ (mol/L)              | < 5.0   | Spiked lake and river water samples                                    | 7    |
| Fluorescence spectrophotometer                                 | 3.62 $\mu\text{M}$                  | 40 s          | $(3.62 \times 10^{-6}$ to $1 \times 10^{-4})$ (mol/L)              | 2.82    | Synthetic water                                                        | 8    |
| UV-Vis spectrophotometric                                      | 3.71 $\mu\text{M}$                  | 35 s          | (0.1–1.0) (mg/L)                                                   | 2.4–3.1 | Synthetic water                                                        | 9    |
| Fluorescence spectrophotometer                                 | $4.8 \times 10^{-6}$ $\mu\text{M}$  | 15 min        | $(1.0 \times 10^{-10}$ to $1.0 \times 10^{-5})$ (M/L)              | < 5.0   | Synthetic water                                                        | 10   |
| Reflectance spectrophotometry                                  | 12.6 $\mu\text{M}$                  | 3 min         | $(0.34 \times 10^{-3}$ to $10.75 \times 10^{-3})$ (mg/L)           | 1.73    | –                                                                      | 11   |
| Diffuse reflectance measurements using a miniature fiber optic | 6.67 $\mu\text{M}$                  | --            | 0.18-2 ppm                                                         | 8.8     | Leachates from cookware, antacids and hygienic care products           | 12   |

|                                    |                     |       |                            |     |                                                  |                  |
|------------------------------------|---------------------|-------|----------------------------|-----|--------------------------------------------------|------------------|
| spectrometer                       |                     |       |                            |     |                                                  |                  |
| Spectrofluorimeter                 | 0.05 $\mu\text{M}$  | –     | –                          | 5   | Dialysis solutions and water                     | <sup>13</sup>    |
| <b>HO/g-CN fluorescence sensor</b> | 0.272 $\mu\text{M}$ | 2 min | 1.85 – 14.82 $\mu\text{M}$ | 2.6 | Real water samples and crabs (Brachyura) samples | <b>This work</b> |

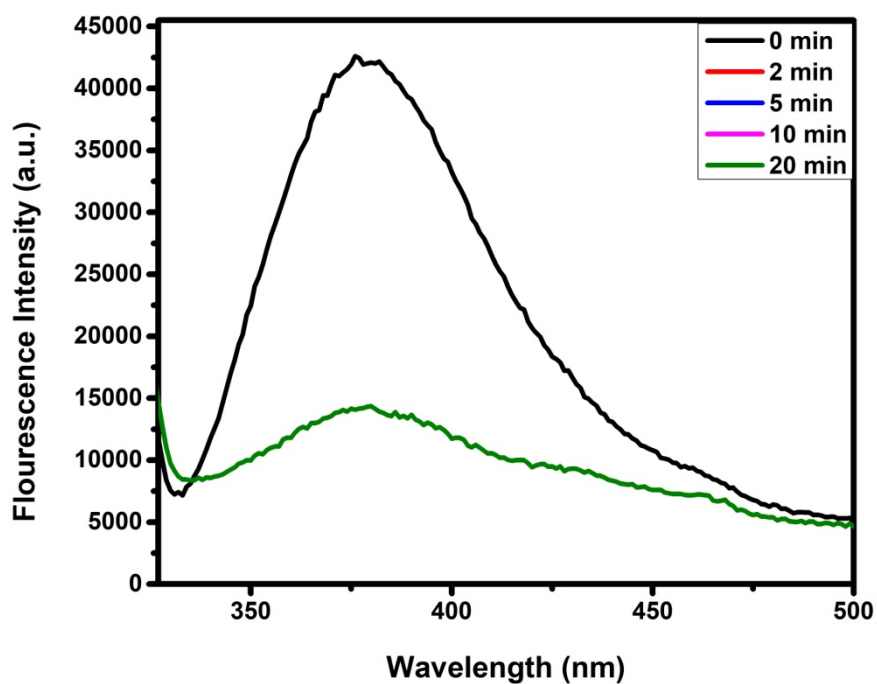

Figure S3. Time-dependent fluorescence quenching of HO/g-CN by 3.0 ppm  $\text{Al}^{3+}$  in phosphate buffer (pH 8). (Excitation at 290 nm).

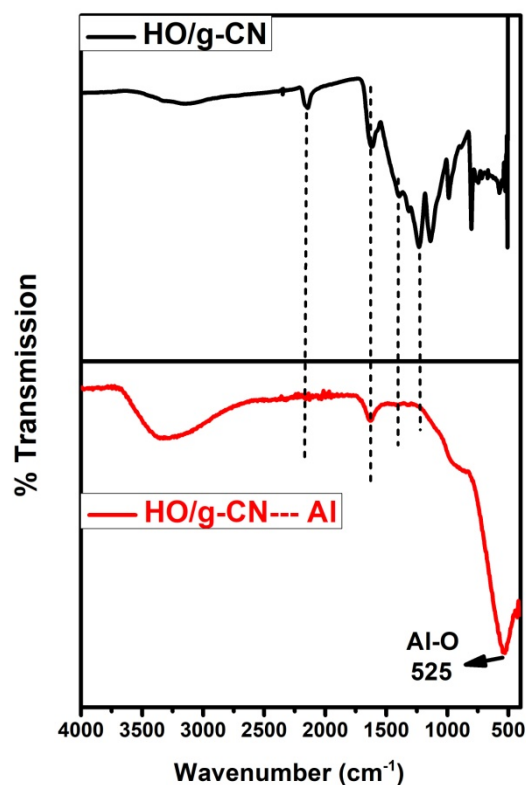

Figure S4: FTIR spectra of HO/g-CN and HO/g-CN-Al(III).

## References

1. P. Liang, L. Yang, B. Hu and Z. Jiang, *Analytical sciences*, 2003, **19**, 1167-1172.
2. H. Zheng, X. Gao, L. Song, H. Guo, S. Yang and X. Chang, *Microchimica Acta*, 2011, **175**, 225-231.
3. L. Djerahov, P. Vasileva, I. Karadjova, R. M. Kurakalva and K. K. Aradhi, *Carbohydrate polymers*, 2016, **147**, 45-52.
4. M. H. Mashhadizadeh and M. Amoli-Diva, *Journal of Analytical Atomic Spectrometry*, 2013, **28**, 251-258.
5. H. Ciftci, C. Er and M. Ozkan, *Desalination and Water Treatment*, 2016, **57**, 6916-6924.
6. Ö. Yalçinkaya, H. Erdoğan, H. Ciftci and A. R. Türker, *Spectroscopy Letters*, 2012, **45**, 344-351.
7. F. B. M. Suah, M. Ahmad and L. Y. Heng, *Sensors and Actuators B: Chemical*, 2014, **201**, 490-495.
8. N. S. Muk and R. Narayanaswamy, *Analytical and Bioanalytical Chemistry*, 2006, **386**, 1235-1244.
9. S. M. Supian, T. L. Ling, L. Y. Heng and K. F. Chong, *Analytical methods*, 2013, **5**, 2602-2609.
10. L. Mendecki, S. Granados-Focil, M. Jendrlin, M. Mold and A. Radu, *Analytica Chimica Acta*, 2020, **1101**, 141-148.
11. M. Ahmad and R. Narayanaswamy, *Science of the total environment*, 1995, **163**, 221-227.

12. V. Castaneda-Loaiza, M. Diaz-de-Alba, M. Granado-Castro, M. Galindo-Riano and M. Casanueva-Marengo, *Talanta*, 2019, **205**, 120102.
13. Y. İ. Coşkun and E. Henden, *Journal of analytical chemistry*, 2020, **75**, 167-175.
